# Supplementary material
Source: publisher figshare collection journal article supplement (https://acs.figshare.com/ndownloader/files/5119603)
Supplement: Supplementary file 1 [file 5119603]

## Supporting Information

### “Photocontrolled Microphase Separation of Block Copolymer in Two Dimensions”

Sohei Kadota et al.

<Surface pressure vs area ( $\pi$ -A) isotherms>

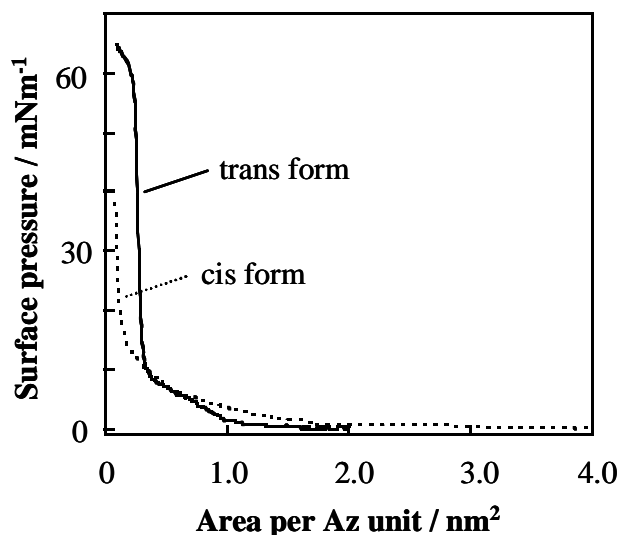

Surface pressure vs area ( $\pi$ -A) isotherms of the triblock copolymer spread from a chloroform solution onto the water surface at 20°C. Data taken in the trans and cis form are represented by solid and dot line, respectively. The features of the curves can be basically regarded as a superposition of those for Az homopolymer and PEO, indicating that this ABA block copolymers are spread as “pure” 2D monolayers on water without 3D coil formation. Lift-off areas per Az unit of trans form and cis form were 1.4, and 2.2  $\text{nm}^2$ , respectively, indicating an expansion in the cis form at low pressures below 5  $\text{mN m}^{-1}$ . Limiting areas per Az unit of trans form was 0.31  $\text{nm}^2$ .
